# Supplementary material
Source: publisher figshare collection journal article supplement (https://acs.figshare.com/ndownloader/files/10245483)
Supplement: Supplementary file 1 [file 10245483]

# Supporting Information

## Layer-By-Layer Decorated Nanoparticles with Tunable Antibacterial and Antibiofilm Properties against Both Gram-Positive and Gram-Negative Bacteria

*Aleksandra Ivanova<sup>1</sup>, Kristina Ivanova<sup>1</sup>, Javier Hoyo<sup>1</sup>, Thomas Heinze<sup>2</sup>, Susana Sanchez-Gomez<sup>3</sup>  
and Tzanko Tzanov<sup>1\*</sup>*

<sup>1</sup> Group of Molecular and Industrial Biotechnology, Department of Chemical Engineering,  
Universitat Politècnica de Catalunya, Rambla Sant Nebridi 22, 08222, Terrassa, Spain

<sup>2</sup> Center of Excellence for Polysaccharide Research, Institute of Organic Chemistry and  
Macromolecular Chemistry, Friedrich Schiller University of Jena, Humboldtstraße 10, 07743  
Jena, Germany

<sup>3</sup> Bionanoplus S.L., Pol. Mocholi, Plaza Cein 5, nave B14, 31110, Noáin, Spain

\*Corresponding author: e-mail: [tzanko.tzanov@upc.edu](mailto:tzanko.tzanov@upc.edu)

### **LbL coating of NPs with FITC-labeled AC**

10 mg/mL solution of AC was prepared in sodium carbonate buffer pH 9. Fluorescein isothiocyanate (FITC) was dissolved in anhydrous dimethyl sulfoxide at 1 mg/mL. For each 1 mL of AC solution, 50  $\mu$ L of FITC solution were added slowly under stirring and then the reaction was incubated in dark for 8 h at 4  $^{\circ}$ C. The unreacted FITC was removed using PD-10 desalting columns (Sigma Aldrich). The LbL assembly of FITC labeled AC and HA was performed on the polymer NPs template. The coating of colloidal particles was confirmed using fluorescence microscope. The detected fluorescence is from the successful multilayered deposition of the cationic AC on the NPs' surface.

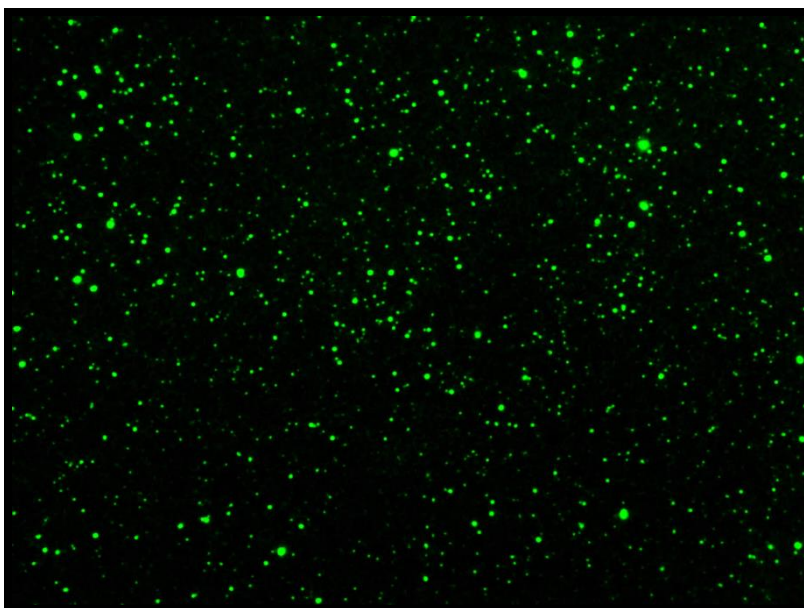

**Figure S1.** Microscopic image of FITC-labeled AC/HA multilayers deposited on the NPs' surface.

### MIC of AC against *S. aureus* and *E. coli*

The antibacterial activity of the AC was assessed against *S. aureus* and *E. coli* (Figure S2). The OD measurements showed that 80  $\mu\text{g/mL}$  of AC (3.5  $\mu\text{mol/mL}$  amino groups) is the minimal concentration needed to eradicate both bacterial strains. The amino groups functionalities on the surface of the NPs (1.09  $\mu\text{mol/mL}$ ) and those present in the bulk AC solution (3.5  $\mu\text{mol/mL}$ ) were different and confirmed the synergy between the nano-form and amino groups.

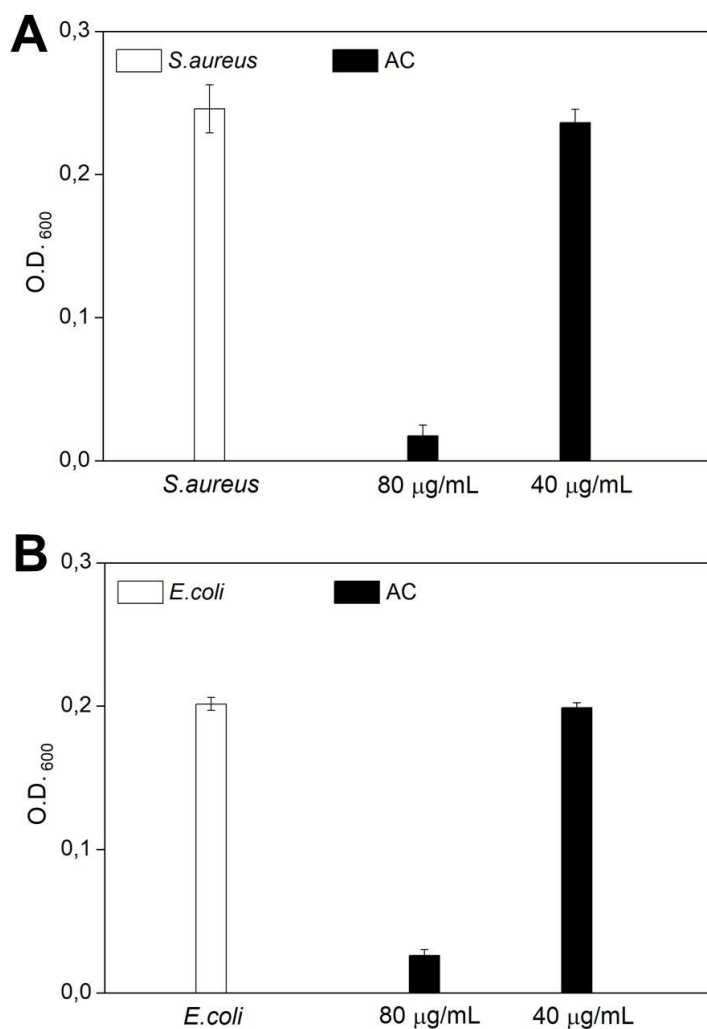

**Figure S2.** *S. aureus* and *E. coli* growth after 24 h incubation with different concentrations of AC.

### Antibacterial activity of LbL NPs decorated with five layers of AC and HA

The polymer NP templates were initially functionalized with five layers of AC and HA and their antibacterial properties were assessed against Gram-positive *S. aureus*. The coated NPs did not affect the bacterial growth, which was due to the insufficient amount of AC in the multilayered shell (Figure S3). The development of efficient bactericidal system requires more available amino groups on the NPs surface and could be achieved with the deposition of more layers.

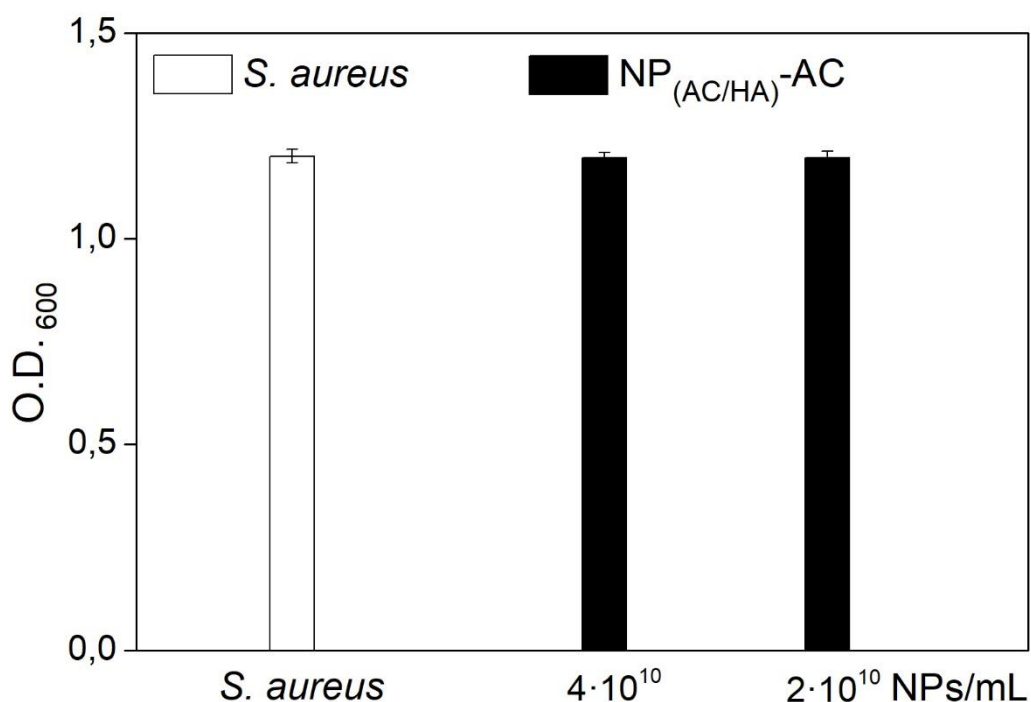

**Figure S3.** *S. aureus* growth after 24 h incubation with coated NPs.
